# Supplementary material for: Systemic and mucosal immune responses following oral adenoviral delivery of influenza vaccine to the human intestine by radio controlled capsule
Source: PubMed Central journal article supplement (PMC5121599; doi:10.1038/srep37295), 2016-11-24
Supplement: srep37295-s1.pdf [file srep37295-s1.pdf]

Systemic and mucosal immune responses following oral adenoviral delivery of influenza vaccine to the human intestine by radio controlled capsule

Leesun Kim<sup>1</sup>, C. Josefina Martinez<sup>1</sup>, Katie A. Hodgson<sup>1</sup>, George R. Trager<sup>1</sup>, Jennifer R. Brandl<sup>1</sup>, Erik P. Sandefer<sup>2</sup>, Walter J. Doll<sup>2</sup>, Dave Liebowitz<sup>1</sup>, Sean N. Tucker<sup>1\*</sup>

Supplemental Figure

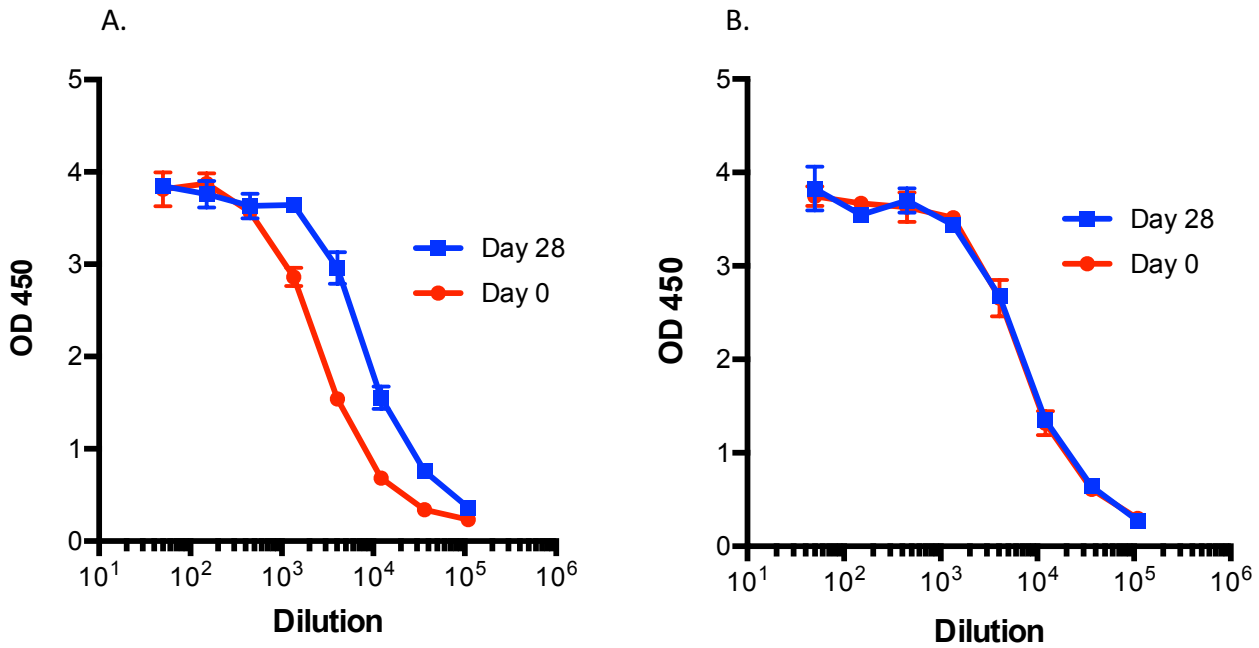

Supplemental Figure: Dilution vs OD curves showing example ELISA responses pre and post immunization for a subject with a detectable increase in the IgG Titers to HA (A) and for a subject with an undetectable response (B).
